# Supplementary material
Source: PubMed Central journal article supplement (PMC10398238)
Supplement: mmc1.pdf [file mmc1.pdf]

**Biophysical Journal, Volume 122**

**Supplemental information**

**Structural effects of spike protein D614G mutation in SARS-CoV-2**

**Hisham M. Dokainish and Yuji Sugita**

**Supporting Information of**

## **Structural Effects of Spike Protein D614G Mutation in SARS-CoV-2**

**Hisham M. Dokainish<sup>1</sup> and Yuji Sugita<sup>1,2,3,\*</sup>**

<sup>1</sup>Computational Biophysics Research Team, RIKEN Center for Computational Science, 7-1-26 Minatojima-minamimachi, Chuo-ku, Kobe, Hyogo 650-0047, Japan

<sup>2</sup>Theoretical Molecular Science Laboratory, RIKEN Cluster for Pioneering Research, 2-1 Hirosawa, Wako, Saitama 351-0198, Japan

<sup>3</sup>Laboratory for Biomolecular Function Simulation, RIKEN Center for Biosystems Dynamics Research, 6-7-1 Minatojima-minamimachi, Chuo-ku, Kobe, Hyogo 650-0047, Japan

\* Corresponding author (sugita@riken.jp)

**Supplementary file includes:**

Figure S1-S13

Table S1-S2

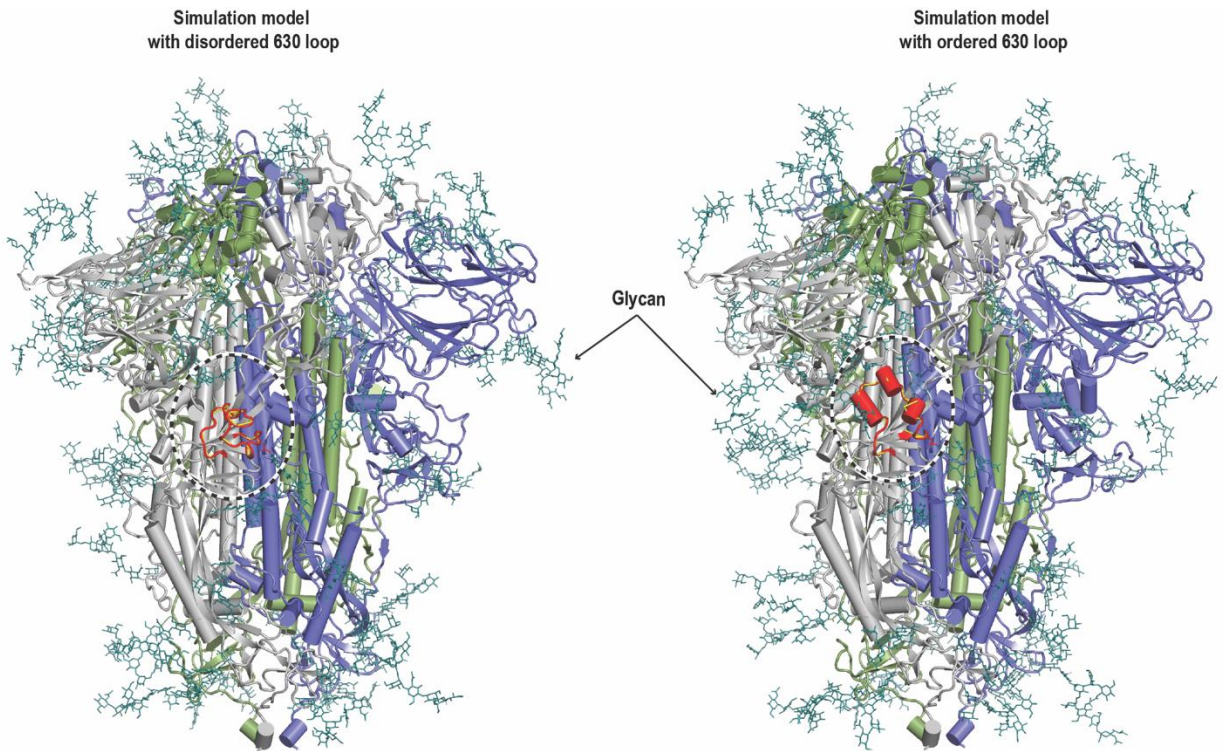

**Figure S1. Cartoon representation of S-protein simulation models.** Left: model of S-protein with disordered 630-loop based on PDB:6ZGE cryo-EM structures. Glycans were added in similar fashion to our previous study using the same list of Glycans. Right: Spike model with ordered 630-loop. The structure is also based on PDB:6ZGE while 630-loop structure was based on PDB:6XLU. Glycans are shown as deep teal sticks. The disordered 630-loop is shown in dark red and highlighted by dotted black circle.

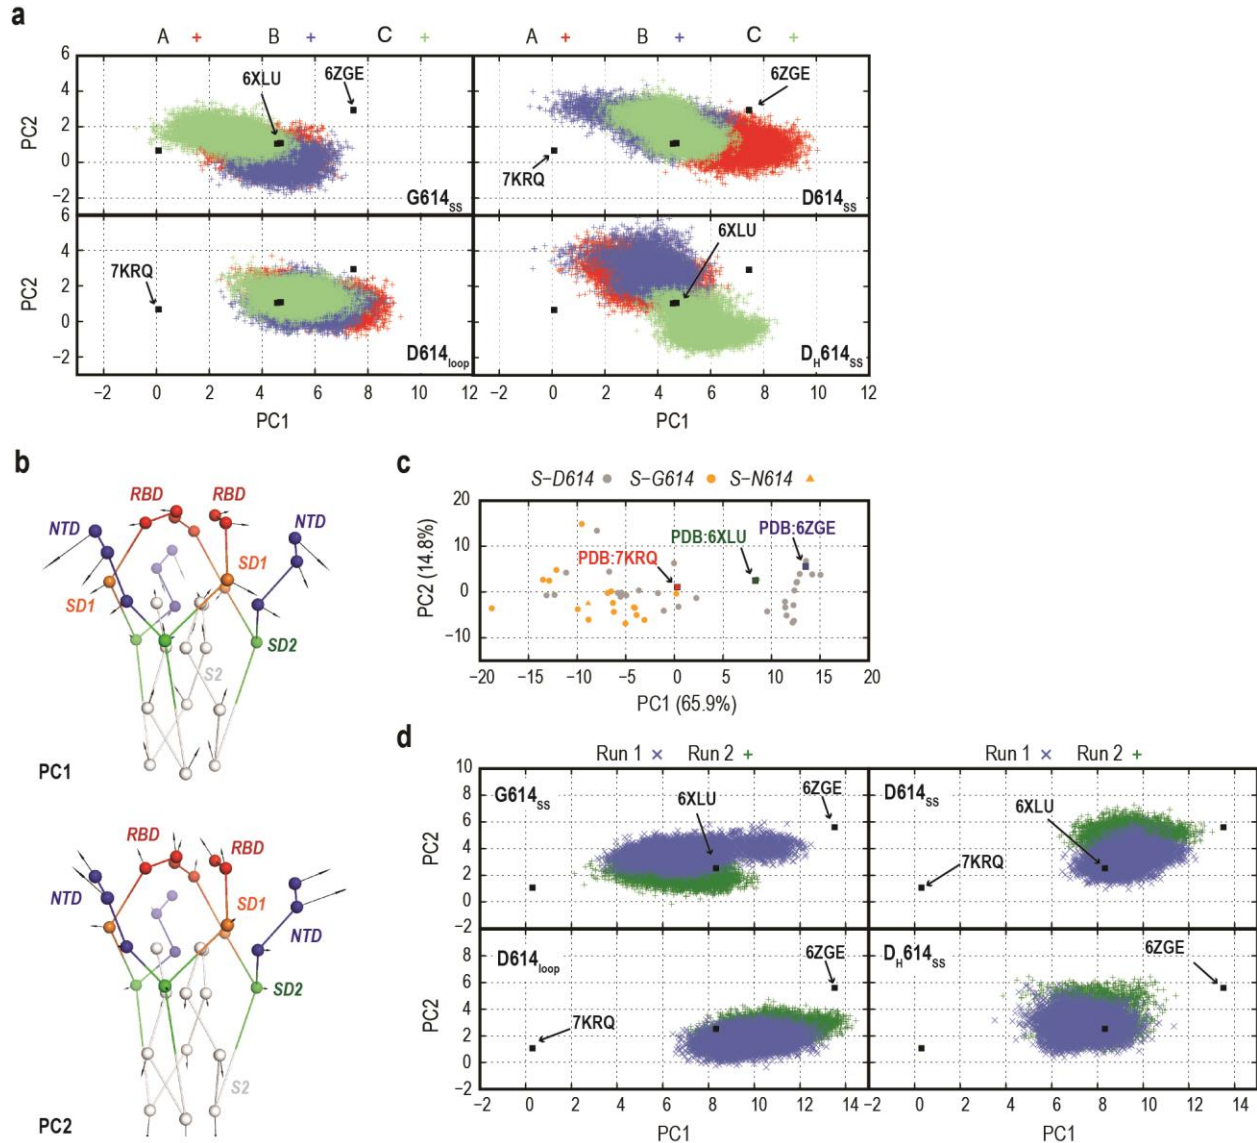

**Figure S2. Trimeric 33 beads PCA analysis.** **a)** Monomeric PCA projection of Run2 of all 4 systems. **b)** The lowest two modes (PC1 and PC2) from the 33 beads trimeric PCA of 52 cryo-EM structures. **c)** Projection of the 52 cryo-EM structure along PC1-PC2 space, where grey and orange represent D614 and G614 structures, respectively. Three important cryo-EM structures of wild type (PDB:6ZGE), wild type at pH 4 (PDB:6XLU) and D614G mutant (PDB:7KRQ) are shown as blue, green and red squares, respectively. **d)** Projections of all performed simulation snapshots using the 33-beads model. The two independent runs are shown in blue and green.

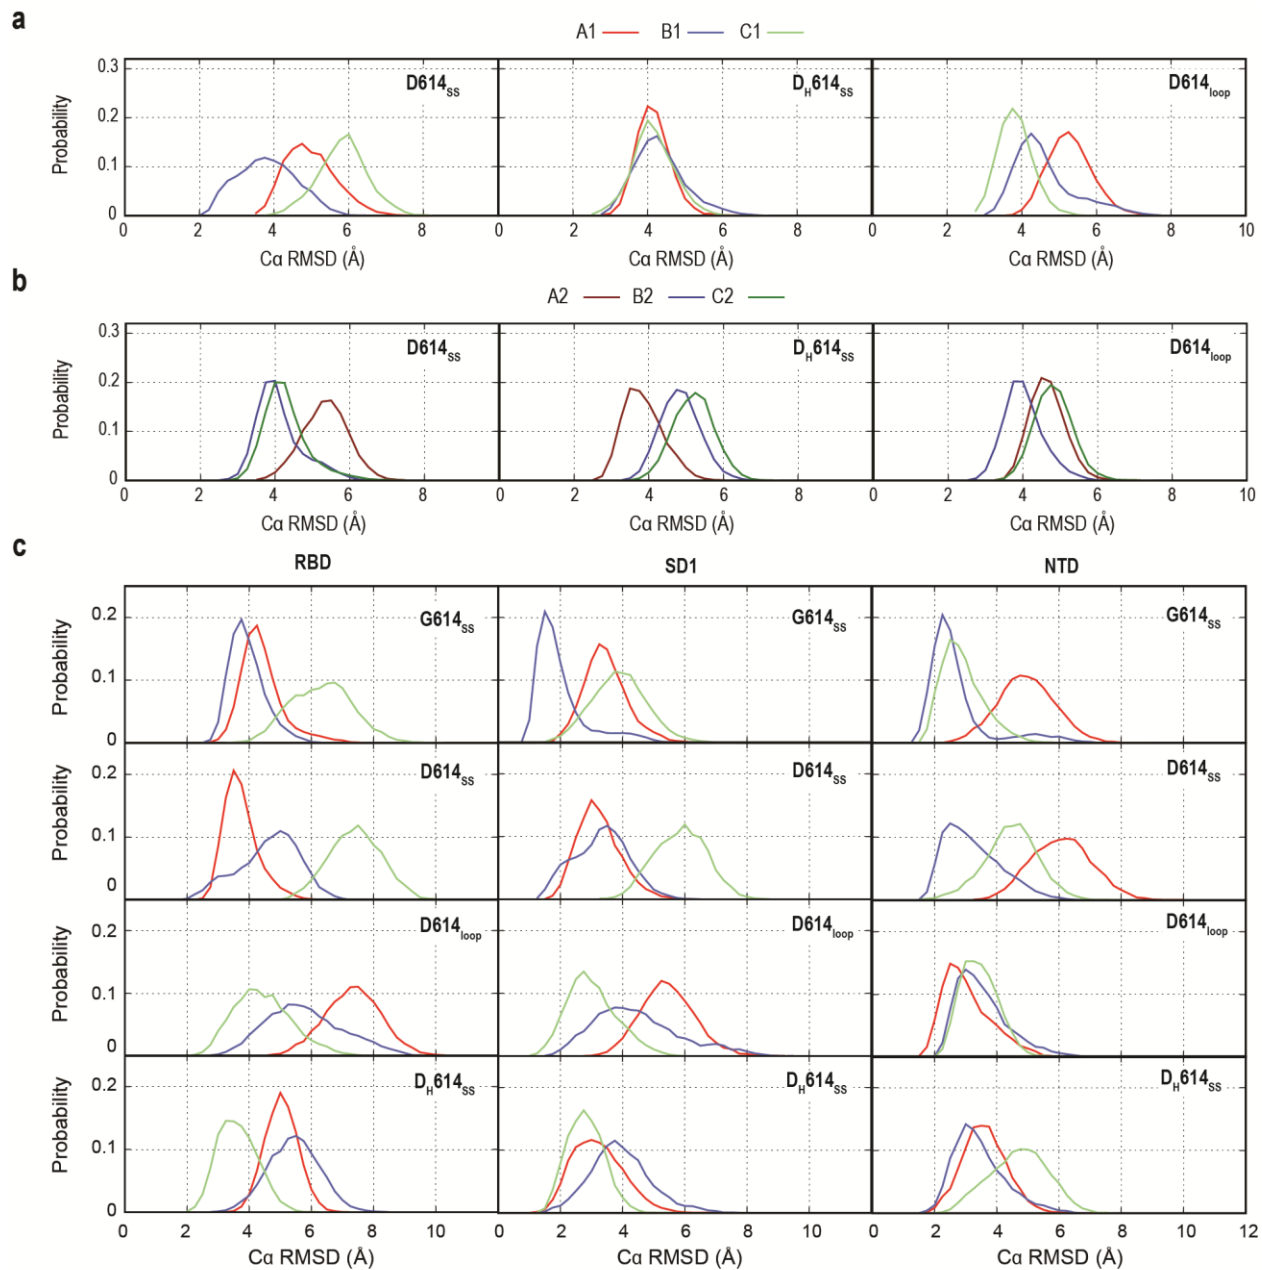

**Figure S3. Domain RMSD analysis with respect to PDB:7KRQ.** a) and b) Probability distributions of root mean square deviation (RMSD) of part of S1 (RBD, NTD and SD1) upon fitting S2 in all the three simulations starting from mutant spike structure for Run1 and Run2, respectively. c) Left, middle and right represent individual domains RMSD probabilities including RBD, SD1 and NTD, respectively. Top, middle top, middle bottom and bottom show the results from G614<sub>ss</sub>, D614<sub>ss</sub>, D614<sub>loop</sub> and D<sub>H</sub>614<sub>ss</sub>, respectively.

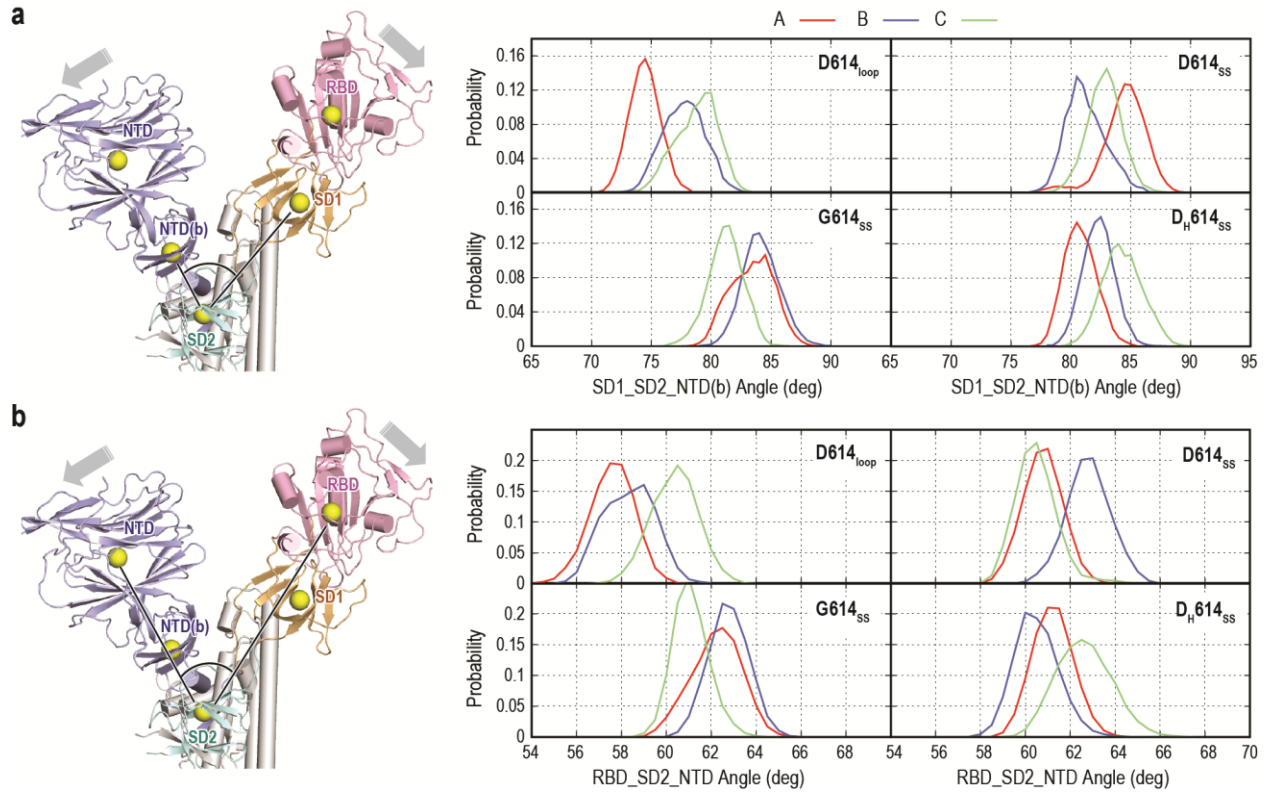

**Figure S4. Structural changes in the interdomain angles upon the 630-loop rigidification.** **a)** Angle formed between base of NTD (NTD(b)), SD2 and SD1 domains. **b)** Angle formed between RBD, SD2 and NTD. In both (a) and (b), Left: cartoon representation of S1 protomer is shown, where the center of mass of each domain are highlighted by yellow sphere representation. Right, probability distributions of the calculated angles.

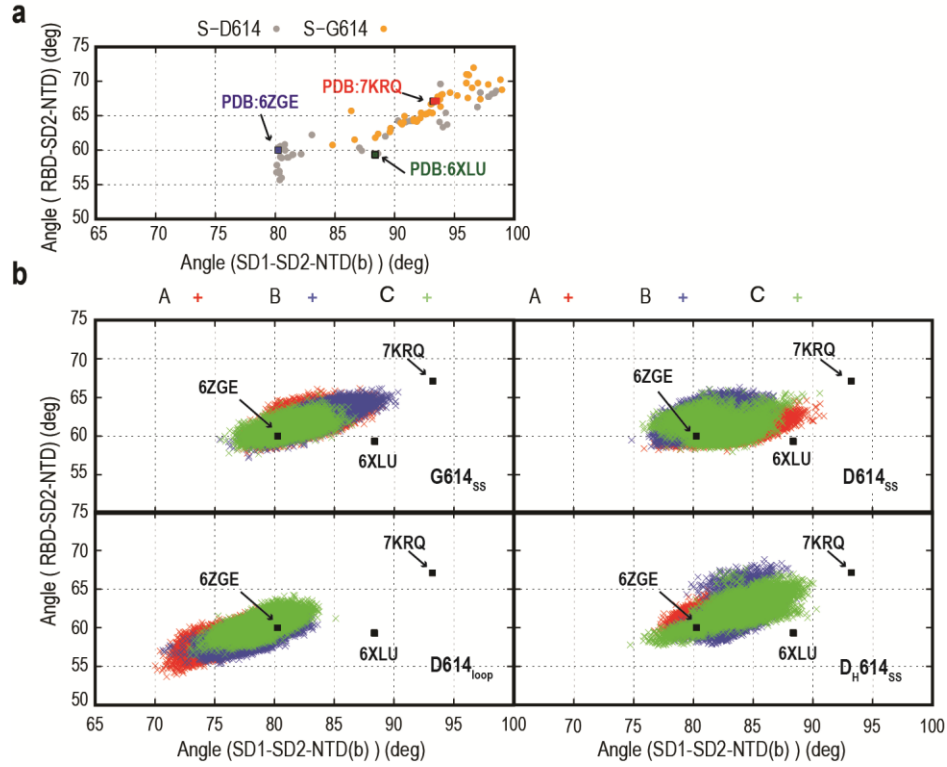

**Figure S5. Interdomain angles in Cryo-EM structures and simulations.** **a)** Distribution of interdomain angles in 156 protomers from Cryo-EM structures. **d)** Simulation interdomain angle distribution along main Cryo-EM structures of wild type and mutant (shown as black boxes).

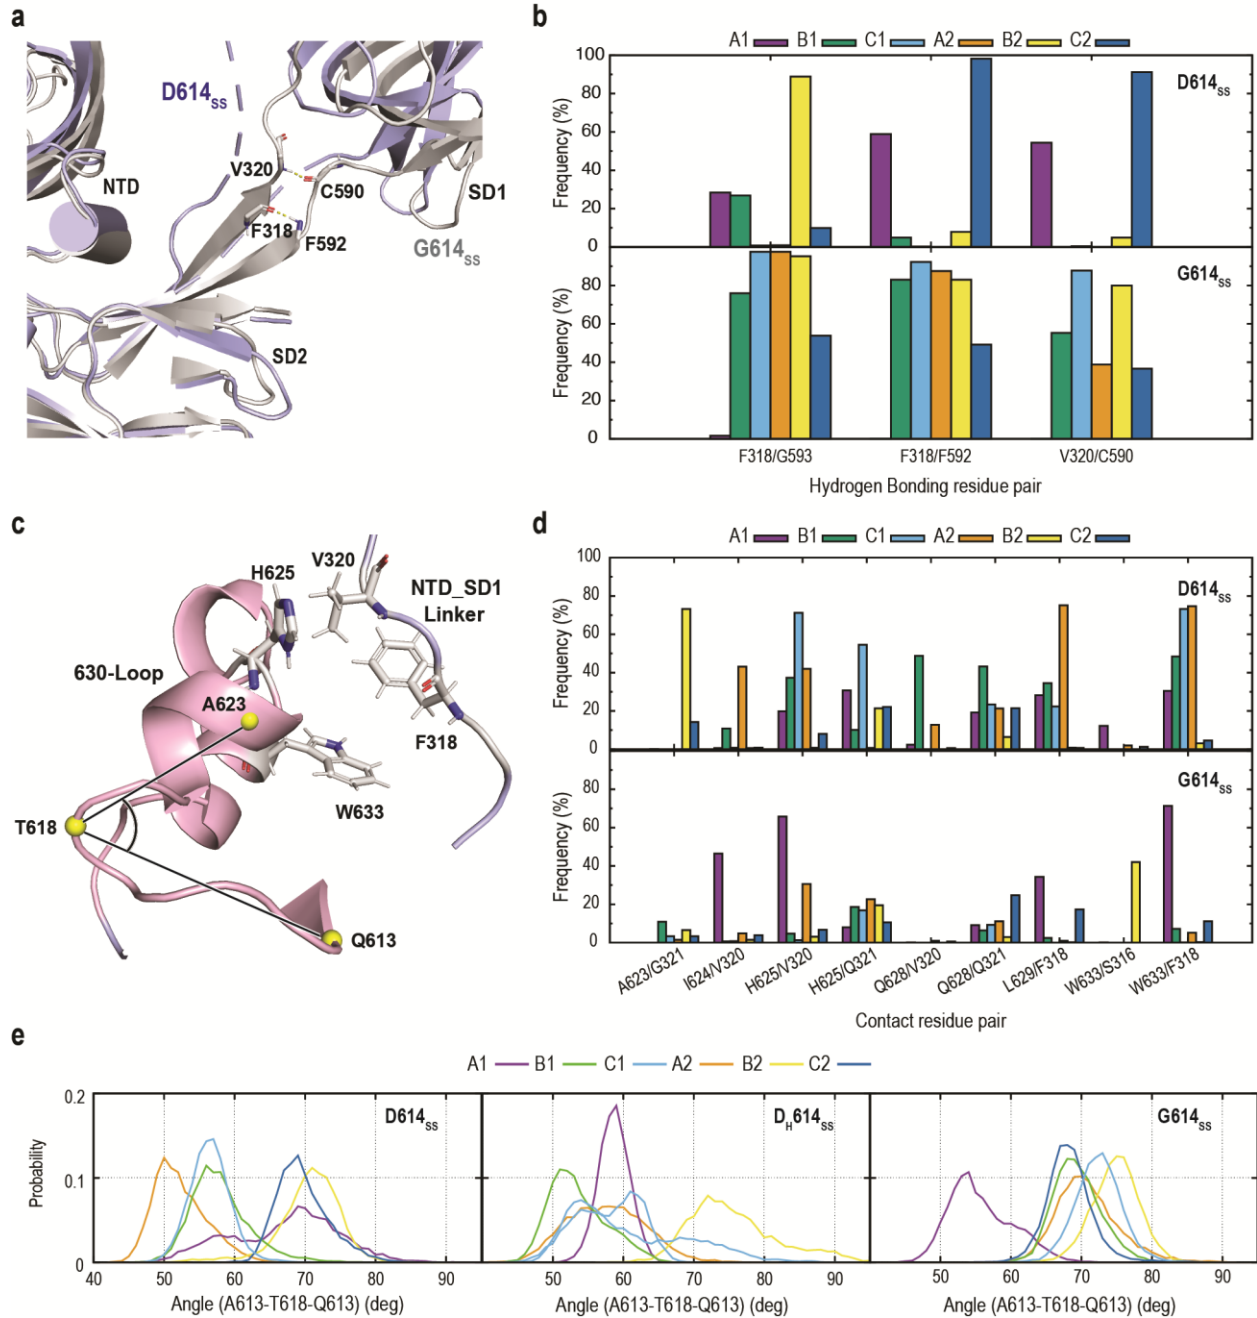

**Figure S6. 630-loop insertion in G614<sub>ss</sub> vs D614<sub>ss</sub>.** **a)** Cartoon representation of the linker regions connecting NTD to SD1 (residue 315 to 321) and SD1 to SD2 (residue 590 to 595) of the last simulation structure in the two protomers that show conversion toward mutant structure projection in Figure 2 (protomer B in G614<sub>ss</sub> (grey) and D614<sub>ss</sub> (purple)). Two backbone hydrogen bonding interactions are highlighted as yellow dotted line. **b)** Probability distributions of 3 linker regions backbone hydrogen bonding interactions in D614<sub>ss</sub> (top) and G614<sub>ss</sub> (bottom). All 6 protomers of the two replicas per system are shown and indicated as A, B, C protomer, where 1 and 2 represent the replica number. **c)** Molecular representation of the 630-loop and NTD\_SD1 linker hydrophobic interactions. Three C $\alpha$  atoms are highlighted as yellow sphere, where the angle formed by them as shown as black line. **d)** Probability distribution of hydrophobic contacts between 630-loop and NTD\_SD1 linker region. **e)** Probability distribution of the angle shown in (c) in all simulations with rigidified 630-loop.



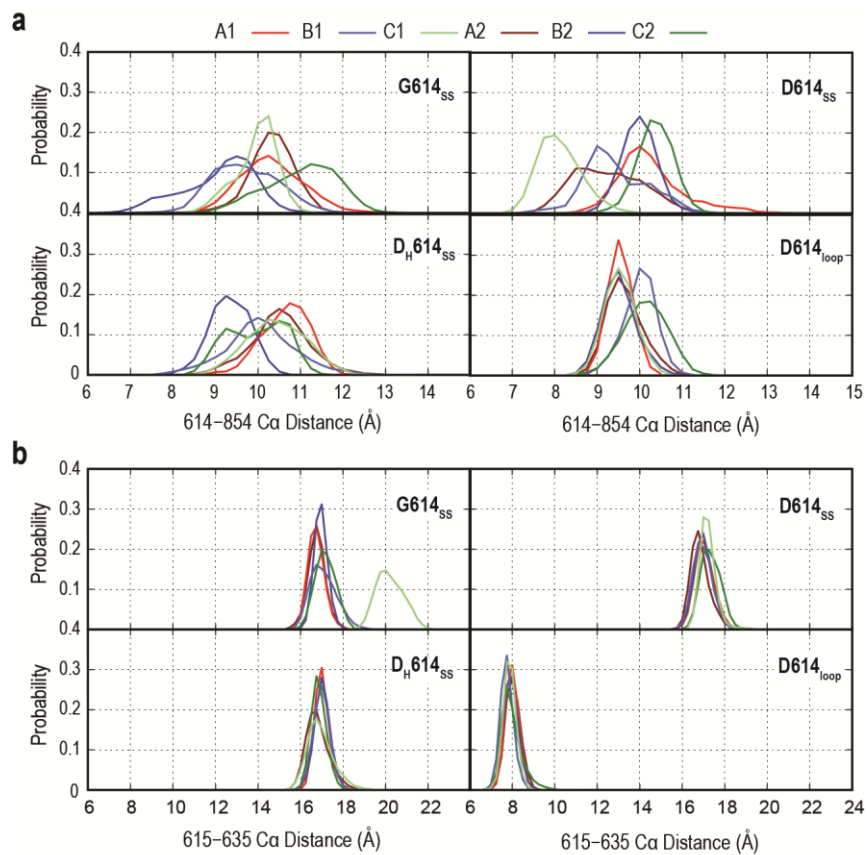

**Figure S7. Changes in key inter-residue distances.** Probability distribution of C $\alpha$  distances between residues D614 (or G614) and K854 (**a**) and between residues V615 and V635 (**b**) in the four simulated systems,

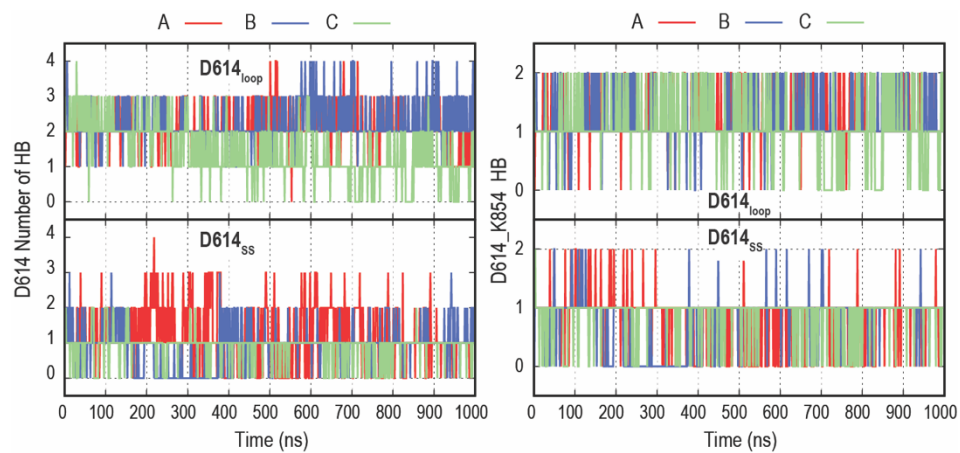

**Figure S8. D614 Hydrogen bonding in Run2.** Time series of D614 side chain total number of H-bonds (left), and D614/K854 salt bridge (right). Protomer are shown as A, B and C with red, blue and green colour, respectively. Top and bottom represent S-D614 with the ordered and disordered 630-loop, respectively.

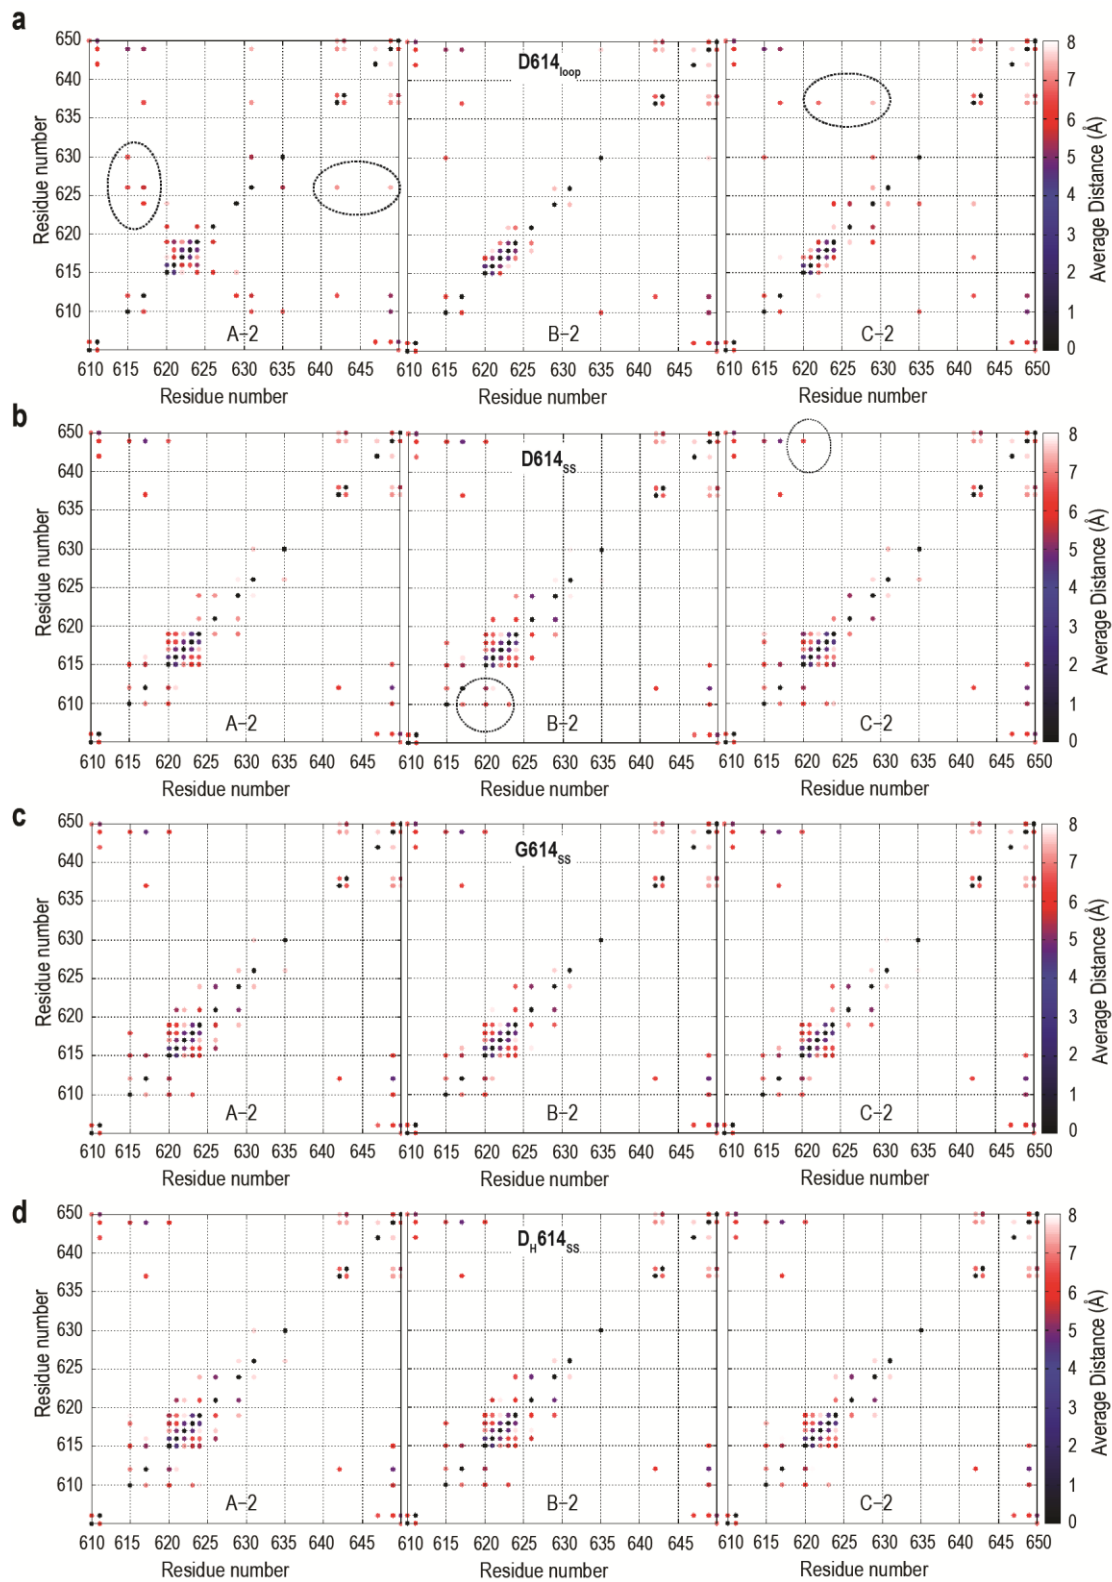

**Figure S9. Hydrophobic contacts in 630-loop.** Heatmap analysis of the average distance between hydrophobic residues in the 610-650 region.

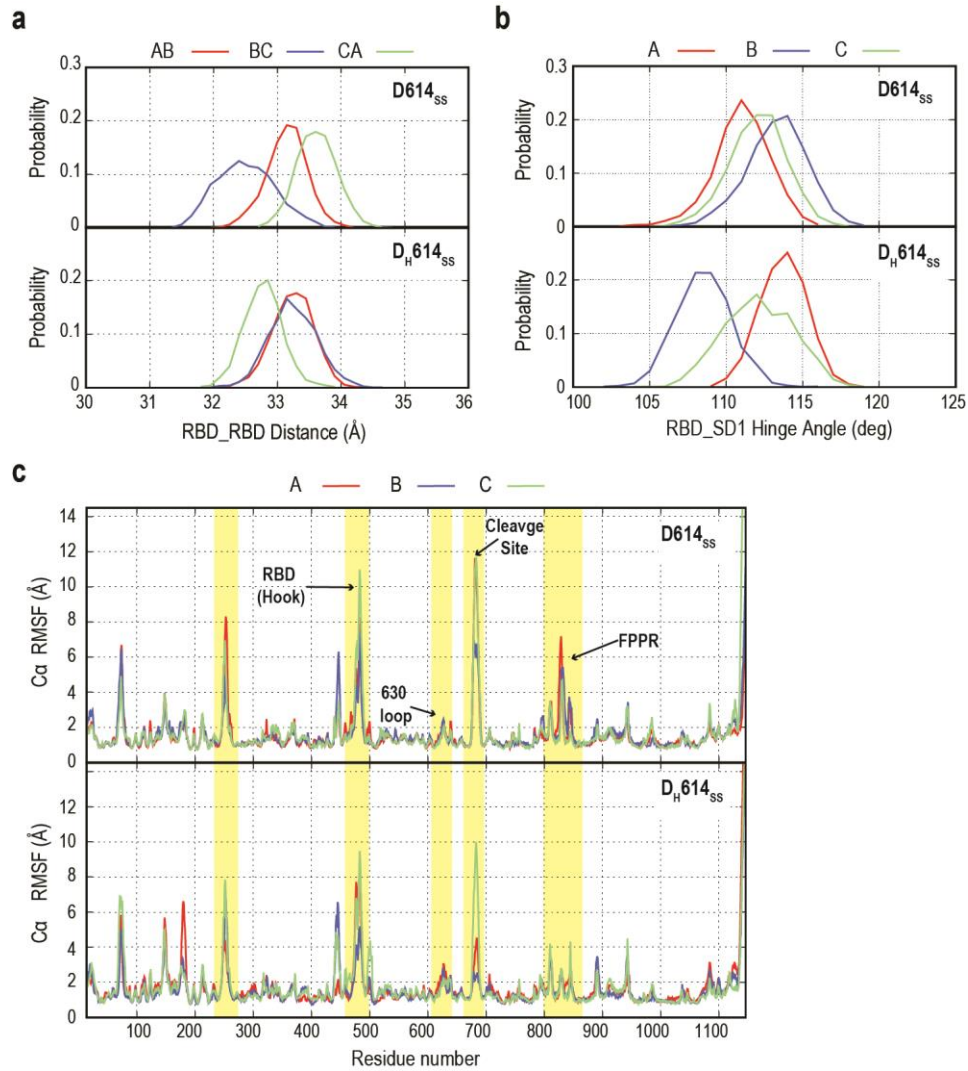

**Figure S10. Stability of S-D614 in the presence of ordered loop with anionic and neutral Asp.** **a)** Probability distribution of inter domain RBD distance (**a**) and RBD/SD1 hinge angle (**b**) in wild-type simulation with ordered 630-loop (D<sub>H</sub>614<sub>ss</sub> and D614<sub>ss</sub>). **c)** Root mean square fluctuation of wild-type spike protomers in anionic (D614<sub>ss</sub>) and neutral D614 (D<sub>H</sub>614<sub>ss</sub>) simulations.

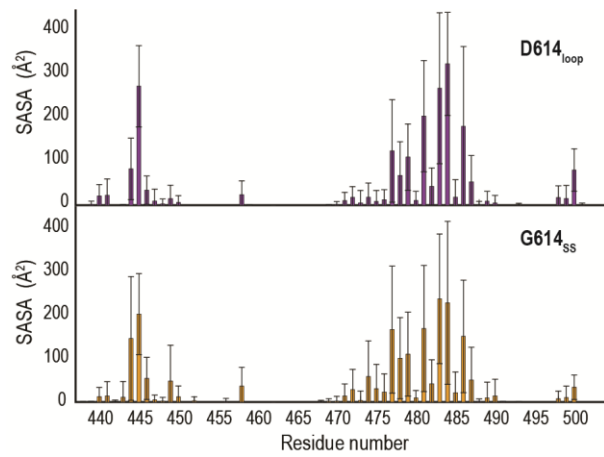

**Figure S11. RBM in wild type vs mutant in the presence of glycans.** Per residue solvent accessible surface area (SASA) analysis of RBD (RBM region) in the presence of glycans in D614<sub>loop</sub> and G614<sub>SS</sub>.

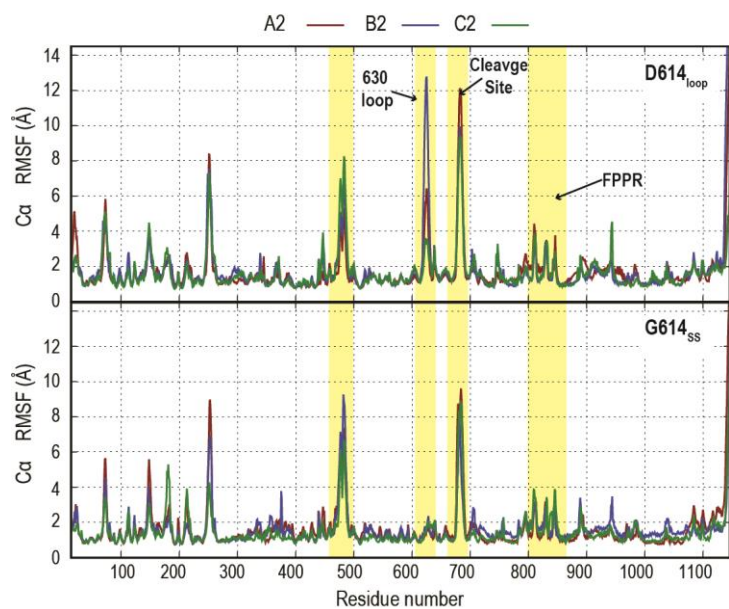

**Figure S12. Root mean square fluctuation of wild-type spike protomers in anionic (D614<sub>loop</sub>) and G614 (G614<sub>ss</sub>) simulations from Run2.**

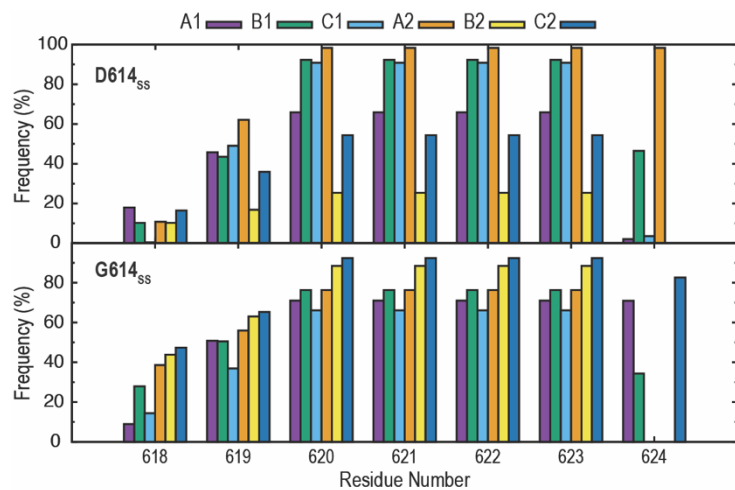

**Figure S13. Individual frequency of  $\alpha$ -helix in D614<sub>ss</sub> and G614<sub>ss</sub>.** The  $\alpha$ -helix in residues near to the mutation point (residue 618 to 624) in wild-type and mutant in the presence of rigidified 630-100

**Table 1. Cryo-EM structures used in the PCA.**

| <b>PDB</b> | <b>Residue 614</b> | <b>PDB</b> | <b>Residue 614</b> | <b>PDB</b> | <b>Residue 614</b> |
|------------|--------------------|------------|--------------------|------------|--------------------|
| 6VXX       | D614               | 6ZP2       | D614               | 7KE8       | G614               |
| 6X29       | D614               | 6ZWV       | G614               | 7KRQ       | G614               |
| 6X2C       | D614               | 7A4N       | N614               | 7L7K       | D614               |
| 6X6P       | D614               | 7BNM       | G614               | 7LWI       | G614               |
| 6X79       | D614               | 7CAB       | D614               | 7LWJ       | G614               |
| 6XF5       | D614               | 7DDD       | D614               | 7LWK       | G614               |
| 6XLU       | D614               | 7DF3       | D614               | 7LWL       | G614               |
| 6XM5       | D614               | 7DWY       | D614               | 7LWS       | G614               |
| 6XR8       | D614               | 7E7B       | D614               | 7LYL       | G614               |
| 6ZB4       | D614               | 7E7D       | D614               | 7LYM       | G614               |
| 6ZB5       | D614               | 7JJI       | D614               | 7M0J       | D614               |
| 6ZGE       | D614               | 7JWY       | D614               | 7N1T       | G614               |
| 6ZGI       | D614               | 7KDG       | D614               | 7N1U       | G614               |
| 6ZOX       | D614               | 7KDI       | G614               | 7NT9       | D614               |
| 6ZOY       | D614               | 7KDK       | G614               | 7JJJ       | D614               |
| 6ZOZ       | D614               | 7KE4       | G614               | 7JJJ       | D614               |
| 6ZP0       | D614               | 7KE6       | G614               |            |                    |
| 6ZP1       | D614               | 7KE7       | G614               |            |                    |



**Table 2. Definition of protomer coarse-grained particles representing rigid domains for PCA.**

| <b>Bead</b> | <b>Residue Number</b>      |
|-------------|----------------------------|
| NTD'        | 44-53, 272-293             |
| NTD         | 27-43, 54-271              |
| NTD(b)      | 116-119, 169-172           |
| RBD         | 330-443, 503-528           |
| RBD'        | 403-410                    |
| SD1         | 323-329, 529-590           |
| SD2         | 294-322, 591-696           |
| S2(1)       | 717-727, 1047-1071         |
| S2(2)       | 711-716, 1072-1122         |
| S2(3)       | 769-772, 1011-1014         |
| S2(4)       | 740-743, 964-967, 999-1002 |
